# Supplementary material for: Mesoporous carbon-supported flower-like Mn-doped Ni–Co layered double hydroxides with high cycling capacitance retention for supercapacitors
Source: Royal Society of Chemistry journal article supplement (doi:10.1039/d3ce00238a), 2023-01-01
Supplement: d3ce00238a1.pdf [file d3ce00238a1.pdf]

## Supplementary Information

### 1. Experimental Section

#### 1.1 Details of electrode materials preparation

In this paper, NiCo-LDH was prepared by hydrothermal method.  $\text{Ni}(\text{NO}_3)_2 \cdot 6\text{H}_2\text{O}$  (4 mmol),  $\text{Co}(\text{NO}_3)_2 \cdot 6\text{H}_2\text{O}$  (2 mmol), HMTA (6 mmol) were dissolved in 60 ml deionized water. Put the solution on the magnetic mixer, set the appropriate number of revolutions, and through magnetic stirring for more than 5 minutes, make it fully mixed to get a clear solution mixed. Then the solution can be transferred to the lining of the washed reaction kettle, and the sealed reaction kettle is placed in the air-blast drying oven in an appropriate way for hydrothermal reaction, and the temperature is heated to 90 °C for 6 h. The cooled sample solution was then rinsed and centrifuged with deionized water for several times (set the centrifuge parameter at  $8000 \text{ rad min}^{-1}$  and kept for 7 min) until the solution in the test tube was clarified and dark green precipitate was obtained. The solution was dried at 60 °C for 12 h and fully ground into powder by agate mortar. NiCoMn-LDH also prepared by hydrothermal method. During the preparation of NiCo-LDH, in the preparation of the precursor solution, manganese nitrate aqueous solution was added in proportion (0.025, 0.05, 0.01, 0.02, 0.03, 0.04 mmol) to replace the same molar mass of  $\text{Co}(\text{NO}_3)_2 \cdot 6\text{H}_2\text{O}$  to obtain NiCoMn-LDH with different doping. Similarly, during the preparation of NiCoMn-LDH, in the preparation of the precursor solution, mesoporous carbon (30 mg) was added to obtain SAC@Ni<sub>2</sub>Co<sub>0.95</sub>Mn<sub>0.05</sub>-LDH.

Fig. S1. Four-probe test results of  $\text{Ni}_2\text{Co}_{0.95}\text{Mn}_{0.05}\text{-LDH}$  and  $\text{SAC@Ni}_2\text{Co}_{0.95}\text{Mn}_{0.05}\text{-LDH}$ , (a) Square resistance (b) Resistivity.

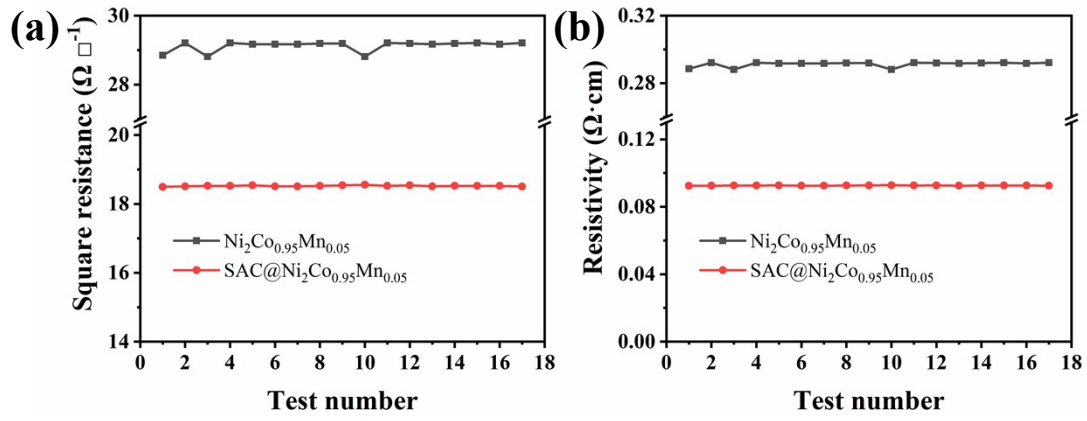

Fig. S2. The element contents of C, O, Ni, Co and Mn from EDS mapping.

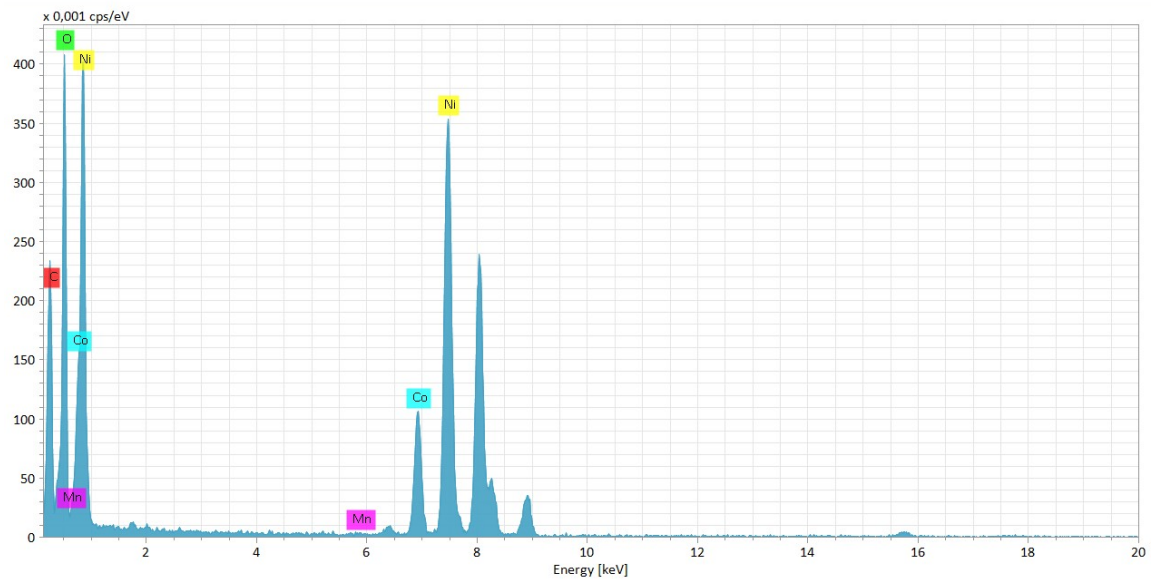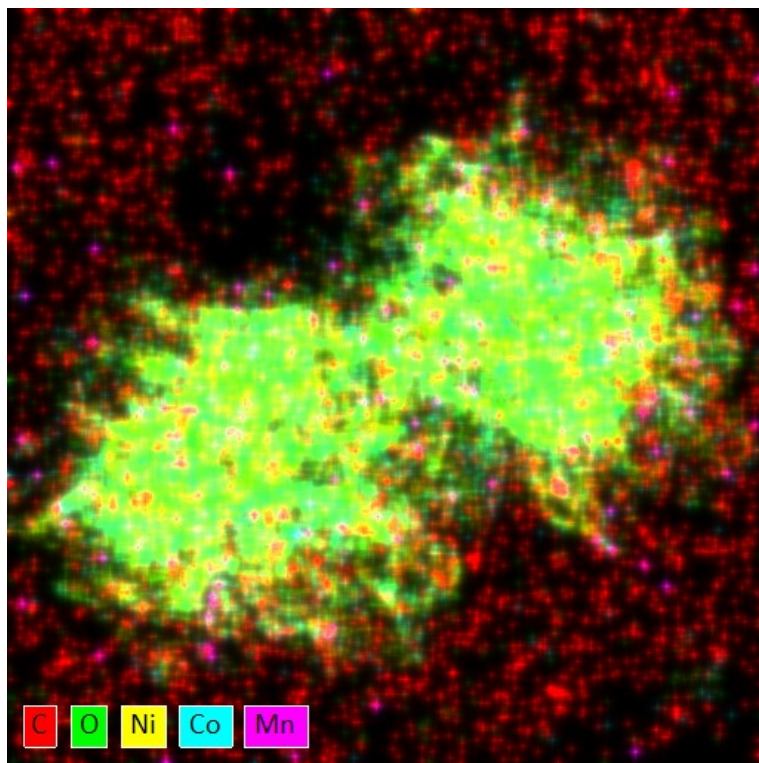

Fig. S3. The XPS spectra of SAC@NiCoMn-LDH Mn 3p.

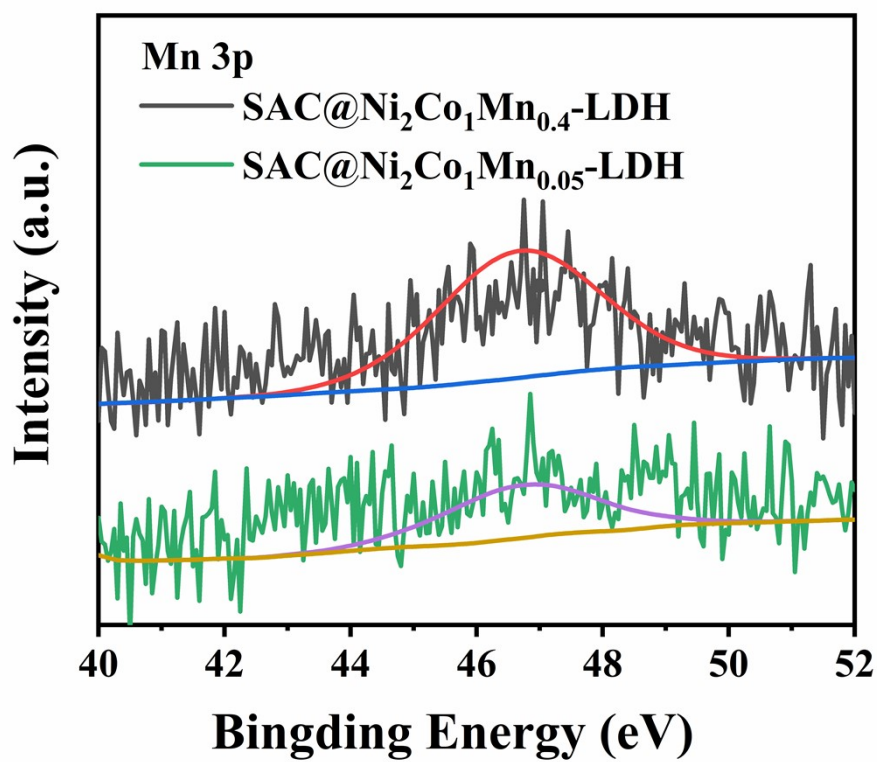

Table S1. The element contents of C, O, Ni, Co and Mn from EDS mapping.

| Element | Mass Norm (%) |
|---------|---------------|
| C       | 26.56         |
| O       | 20.08         |
| Ni      | 40.51         |
| Co      | 12.6          |
| Mn      | 0.10          |

Table S2. The element contents of Ni, Co and Mn from ICP.

| Element | Mass Norm (%) |
|---------|---------------|
| Ni      | 39.91         |
| Co      | 10.92         |
| Mn      | 0.14          |
